# Supplementary material for: Antioxidant Interactions between Citrus Fruit Carotenoids and Ascorbic Acid in New Models of Animal Cell Membranes
Source: MDPI journal article supplement (doi:10.3390/antiox12091733), 2023-09-07

**Supplementary Material S1.** Logarithm fitting curves of DPBF absorbance decay ( $\lambda_{\text{max}} = 413 \text{ nm}$ ) by  $[\text{O}_2(^1\Delta_g)]$  in: (A) organic solvent (SOAC assay; see Materials & Methods), and (B) 5% Triton X-100 micellar suspension in PBS 50 mM, pH 7.5.

(A)

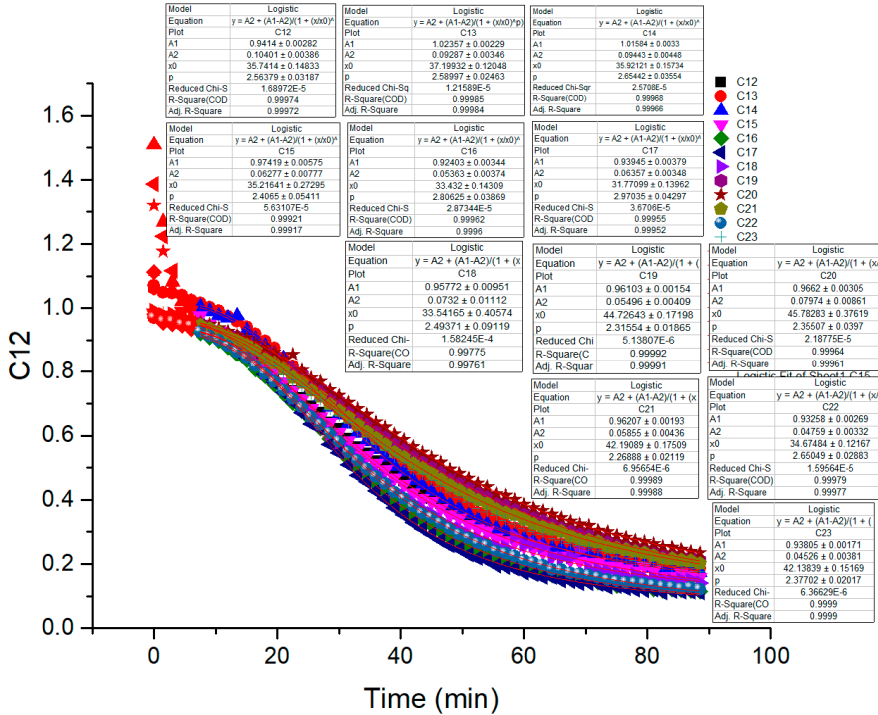

(B)

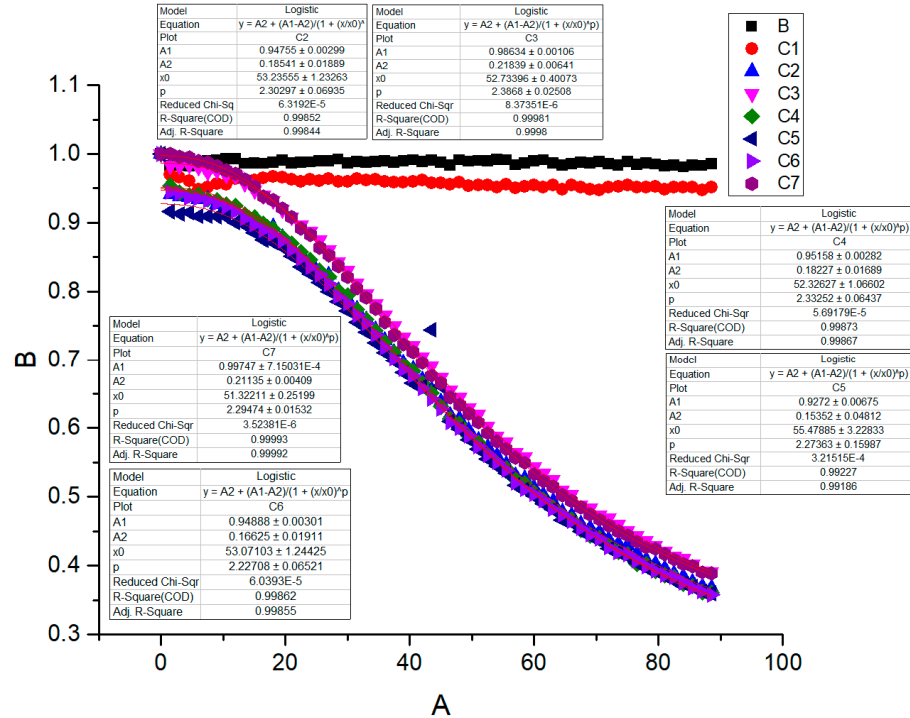

**Supplementary Material 2. Table S2.** Spectroscopic characteristics of main carotenoids identified in the chromatograms of pulp extracts of the four Citrus varieties.

| Peak number | Carotenoid                          | UV-Vis absorption maxima (nm) |
|-------------|-------------------------------------|-------------------------------|
| 1           | Neochrome                           | 328(Z), 409, 431, 458         |
| 2           | * all- <i>E</i> -Violaxanthin       | 415, 438, 468                 |
| 3           | Luteoxanthin isomer 1               | 396, 421, 448                 |
| 3'          | Luteoxanthin isomer 2               | 394, 417, 445                 |
| 4           | * 9- <i>Z</i> -Violaxanthin         | 328(Z), 412, 436, 464         |
| 5           | * Lutein                            | s, 444, 472                   |
| 6           | * Zeaxanthin                        | s, 450, 475                   |
| 7           | * Antheraxanthin                    | s, 441, 469                   |
| 8           | * 15- <i>Z</i> -Phytoene            | 285                           |
| 9           | * Phytofluene isomer                | 331, 346, 364                 |
| 9'          | * Phytofluene isomer                | s, 347, 363                   |
| 10          | * $\beta$ -Cryptoxanthin            | 423, 450, 479                 |
| 11          | * tri- <i>Z</i> - $\zeta$ -Carotene | 296(Z), 375, 399, 423         |
| 11'         | * di- <i>Z</i> - $\zeta$ -Carotene  | 296(Z), 379, 400, 425         |
| 11''        | $\zeta$ -Carotene isomer            | 296(Z), 379, 400, 425         |
| 12          | Neurosporene isomer                 | s, 433, 461                   |
| 13          | * $\beta$ -Carotene                 | s, 452, 478                   |
| 14          | $\delta$ -Carotene isomer           | 431, 457, 487                 |
| 15          | * all- <i>E</i> -Lycopene           | 446, 472, 504                 |

\*Identified using authentic standards; s, shoulder.

**Supplementary Material S3. Figure S3.** Auto-oxidation of 1.5 mM animal cell membrane-like liposomes (AML) compared to 1.5 mM egg-yolk phosphatidylcholine liposomes (PCL) monitored by the fluorescence decay at 600 nm of the free radical-sensitive probe C<sub>11</sub>-BODIPY<sup>581/591</sup>. Inset: Integrated Areas Above Curves (AAC) in PCL and AML to express total lipid/membrane oxidation within 0 to 166 min interval (\*p<0.05).

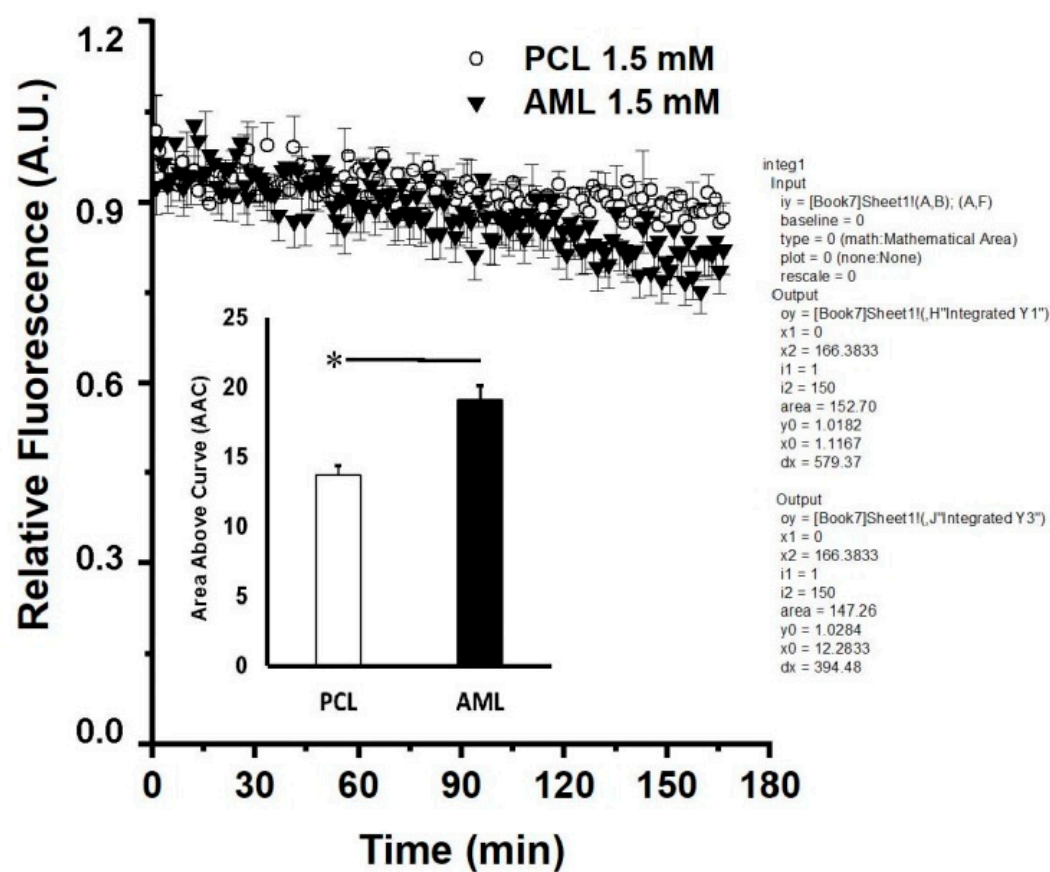

**Supplementary Material S4. Figure S4.** HO•-mediated oxidation of 1.5 mM egg-yolk phosphatidylcholine liposomes (PCL) and/or 1.5 mM AML liposomes, monitored by the fluorescence decay at 600 nm of the free radical-sensitive probe C<sub>11</sub>-BODIPY<sup>581/591</sup>, in PBS 50 mM, pH 7.5, triggered by: (A) 100, 200 or 300 mM H<sub>2</sub>O<sub>2</sub> in the presence of 5 mM:20 mM Fe<sup>2+</sup>:EDTA (1:4 ratio); (B) 25 mM H<sub>2</sub>O<sub>2</sub> in the presence of different concentrations of Fe<sup>2+</sup>:EDTA (1:4 ratio) from 25 μM to 2.25 mM; and (C) log scales for comparison of oxidation in both PC and AML liposomes versus 25 mM H<sub>2</sub>O<sub>2</sub> in the presence of different concentrations of Fe<sup>2+</sup>:EDTA (1:4 ratio) from 25 μM to 2.25 mM.

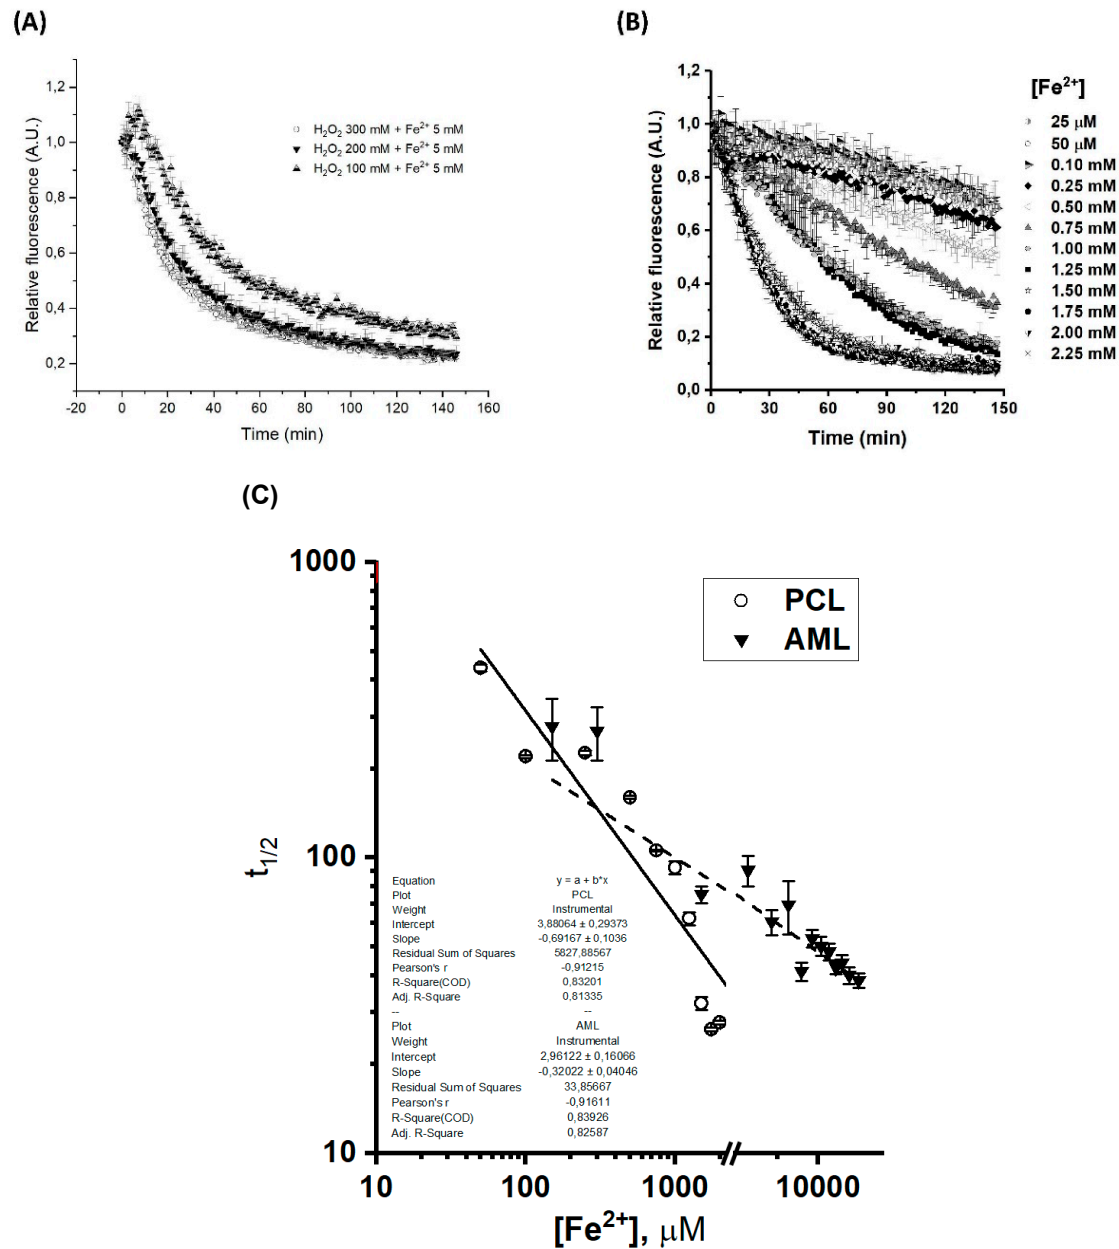

**Supplementary Material 5. Figure S5.** Lipid oxidation of 1.5 mM AML liposomes, monitored by  $C_{11}$ -BODIPY<sup>581/591</sup> kinetics, and triggered by 50 mM  $H_2O_2$  and 0.625 mM  $Fe^{2+}$  and 2.5 mM EDTA, in the presence of 20  $\mu$ M, 0.2 mM, 2 mM, and 20 mM ASC, in PBS 50 mM, pH 7.5.

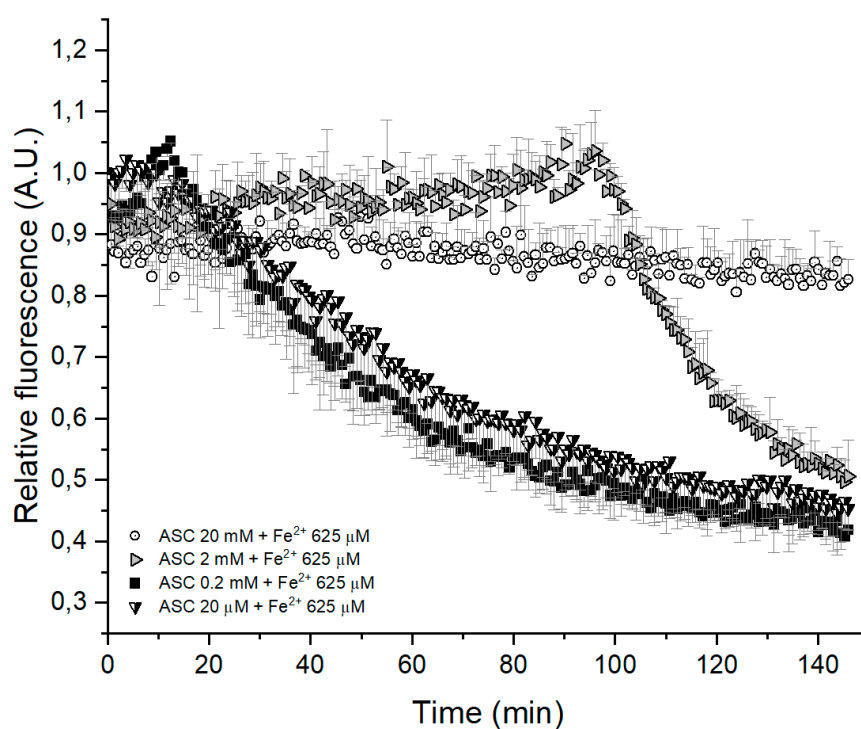

**Supplementary Material 6. Figure S6.** Lipid oxidation of 1.5 mM AML liposomes loaded with 17  $\mu\text{M}$  carotenoids from Valencia sweet oranges, monitored by  $\text{C}_{11}\text{-BODIPY}^{581/591}$  kinetics, and triggered by 50 mM  $\text{H}_2\text{O}_2$  and 0.625 mM  $\text{Fe}^{2+}$  with 2.5 mM EDTA (1:4 ratio), in the presence of 20  $\mu\text{M}$ , 0.2 mM, 2 mM, and 20 mM ASC, in PBS 50 mM, pH 7.5.

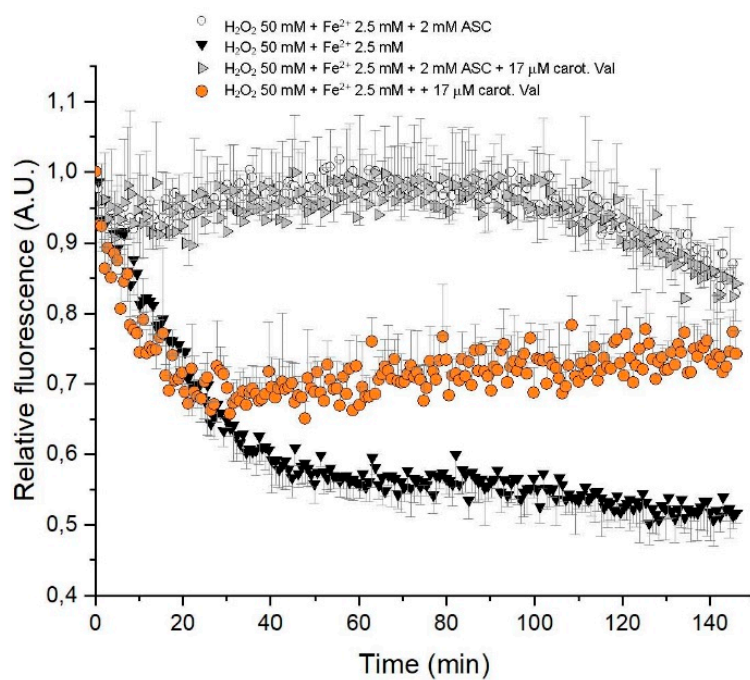

Supplement: s1 [file s1]
